# Supplementary material for: Insight on Solution Plasma in Aqueous Solution and Their Application in Modification of Chitin and Chitosan
Source: MDPI journal article supplement (doi:10.3390/ijms22094308), 2021-04-21
Supplement: s1 [file s1]

| Publications                                                                                    | Year | Raw materials                       |
|-------------------------------------------------------------------------------------------------|------|-------------------------------------|
| J.-J. Zou et al. / Carbohydrate Polymers 55 (2004) 23                                           | 2004 | Starch                              |
| I. Prasertsung et al. / Carbohydrate Polymers 87 (2012) 2745                                    | 2012 | Chitosan                            |
| Y. Wen et al. / Journal of Hazardous Materials 201– 202 (2012) 162                              | 2012 | Chitosan                            |
| Fengming Ma, Int. J. Mol. Sci. 2012, 13, 7788-7797; doi:10.3390/ijms13067788                    | 2012 | Chitosan                            |
| A. Watthanaphanit, N. Saito / Polymer Degradation and Stability 98 (2013) 1072                  | 2013 | Sodium alginate 0.2%                |
| I. Prasertsung et al. / Polymer Degradation and Stability 98 (2013) 2089                        | 2013 | Chitosan                            |
| O. Pornsunthorntawe et al. / Carbohydrate Polymers 102 (2014) 504                               | 2014 | Chitosan                            |
| A. Watthanaphanit et al. / Journal of the Taiwan Institute of Chemical Engineers 45 (2014) 3099 | 2014 | Alginate                            |
| L. Na et al./ Plasma Science and Technology 16 (2014) 128                                       | 2014 | Chitosan                            |
| F. Syahrial et al./ Journal of the Japan Institute of Energy 93 (2014)1207                      | 2014 | Glucose and Cellulose (saccharide)  |
| R. Molina et al./ Cellulose 21 (2014) 729                                                       | 2014 | Cellulose                           |
| T. Tantiapap et al. / Innovative Food Science and Emerging Technologies 32 (2015) 116           | 2015 | Chitosan                            |
| M. Davoodbasha et al./ RSC Advance 5 (2015) 35052                                               | 2015 | Cellulose                           |
| I. Rahim et al./Journal of Power and Energy Engineering 3 (2015) 28                             | 2015 | Cellulose                           |
| M. Davoodbasha et al. / Archives of Biochemistry and Biophysics 605 (2016) 49                   | 2016 | Chitosan                            |
| N. Janpetch et al. / Carbohydrate Polymers 148 (2016) 335                                       | 2016 | Bacterial cellulose                 |
| VA Titov et al./ High Energy Chemistry 50 (2016) 411                                            | 2016 | Chitosan                            |
| D. Nikitin et al. / Carbohydrate Polymers 154 (2016) 30                                         | 2016 | Chitosan                            |
| K. Tange et al./ Journal of the Japan Institute of Energy 95 (2016) 1105                        | 2016 | Cellulose                           |
| I. Prasertsung et al. / Carbohydrate Polymers 172 (2017) 230                                    | 2017 | Microcrystalline cellulose powder   |
| F. Ma et al. / International Journal of Biological Macromolecules 98 (2017) 201                 | 2017 | Chitosan                            |
| F. Ma et al. / International Journal of Biological Macromolecules 103 (2017) 501                | 2017 | Chitosan                            |
| C. Chokradjaroen et al. / Carbohydrate Polymers 167 (2017) 1                                    | 2017 | Chitosan                            |
| Y. Sun et al. / Carbohydrate Polymers 164 (2017) 222                                            | 2017 | Chitosan                            |
| Y. Sun et al./ Environmental Technology 40 (2019) 954                                           | 2017 | Chitosan and acrylamide             |
| F Syahrial et al./, Journal of the Japan Institute of Energy 96 (2017) 451                      | 2017 | Cellulose                           |
| J. Wu et al./ International Journal of Biological Macromolecules 117 (2018) 1299                | 2018 | Auricularia auricula polysaccharide |
| F. Ma et al./ Carbohydrate Polymers 198 (2018) 575                                              | 2018 | Auricularia auricula polysaccharide |
| Chokradjaroen et al./ Japanese Journal Applied Physics 57 (2018) 0102B5                         | 2018 | Chitosan                            |

|                                                                                            |      |                                               |
|--------------------------------------------------------------------------------------------|------|-----------------------------------------------|
| M. Davoodbasha et al. / International Journal of Biological Macromolecules 118 (2018) 1511 | 2018 | Chitosan                                      |
| C. Chokradjaroen et al./ Carbohydrate Polymers 201 (2018) 20                               | 2018 | Chitosan powder                               |
| D.M. Panaitescu et al./ Nanomaterials 8(2018) 467                                          | 2018 | nanocellulose                                 |
| S. Vizireanu et al./ Scientific Reports 8 (2018) 15473                                     | 2018 | Cellulose                                     |
| F. Ma et al./Carbohydrate Polymers 257 (2021) 117567                                       | 2019 | Chitosan                                      |
| I. Prasertsung et al./Carbohydrate Polymers 205 (2019) 472                                 | 2019 | Cassava starch waste                          |
| T. Ju et al./ ACS Sustainable Chem. Eng. 7(2019)593                                        | 2019 | Gracilaria lemaneiformis (medicinal mushroom) |
| K. Tange, Journal of the Japan Institute of Energy 98 (2019)265                            | 2019 | Cellulose                                     |
| Y. Zhou et al. / Poymers 11 (2019) 8                                                       | 2019 | Waxy and Normal Maize Starch                  |
| R. Rujiravanit et al./ Carbohydrate Polymers 228 (2020) 115377                             | 2020 | Chitin                                        |
| V. Titov et al./ Materials 13 (2020) 4821                                                  | 2020 | Chitosan                                      |
| C. Chokradjaroen et al./ Carbohydrate Polymers 237 (2020) 116162                           | 2020 | CMC-AuNPs                                     |
| B. Honnorat et al./ AIP Advances 10 (2020) 095025                                          | 2020 | Sodium carboxymethyl cellulose                |
| O. L. H. Li,et al./ Int. J. Plasma Environ. Sci. Technol. 14 (2020) e01005                 | 2020 | Cellulose                                     |
